# Supplementary material for: Job Stress and Burnout among Social Workers in the VUCA World of COVID-19 Pandemic
Source: MDPI journal article supplement (doi:10.3390/su13137109), 2021-06-24
Supplement: s1 [file s1]

Archive with 1 entries (1 files):
- sustainability-1205504-supplementary.pdf
