# Supplementary material for: Job Stress and Burnout among Social Workers in the VUCA World of COVID-19 Pandemic
Source: MDPI journal article supplement (doi:10.3390/su13137109), 2021-06-24
Supplement: s1 [file s1 › sustainability-1205504-supplementary.pdf]

**Table S1.** Copenhagen Burnout Inventory (CBI-R). Scales, items and response frequencies.

| Response Category and Scoring:                                                             |                                                                   |                                                         |                                                  |                                                      |                                                                             |                       |
|--------------------------------------------------------------------------------------------|-------------------------------------------------------------------|---------------------------------------------------------|--------------------------------------------------|------------------------------------------------------|-----------------------------------------------------------------------------|-----------------------|
|                                                                                            | Always<br>or<br>To a very<br>high degree<br>(Scoring<br>100)<br>% | Often<br>or<br>To a high<br>degree<br>(Scoring 75)<br>% | Sometimes<br>or<br>somewhat<br>(Scoring 50)<br>% | Seldom<br>or<br>To a low degree<br>(Scoring 25)<br>% | Never/<br>almost never<br>or<br>To a very<br>low degree<br>(Scoring 0)<br>% | Score<br>Mean<br>(SD) |
| <b>PB. Personal burnout (<math>\alpha=0.87</math>, N=83)</b>                               |                                                                   |                                                         |                                                  |                                                      |                                                                             |                       |
| 1. How often do you feel tired?                                                            | 12                                                                | 50.6                                                    | 26.5                                             | 7.2                                                  | 3.6                                                                         | 65.0 (23.0)           |
| 2. How often are you physically exhausted?                                                 | 7.2                                                               | 41                                                      | 36.1                                             | 13.3                                                 | 2.4                                                                         | 59.3 (22.3)           |
| 3. How often are you emotionally exhausted?                                                | 10.8                                                              | 44.6                                                    | 26.5                                             | 15.7                                                 | 2.4                                                                         | 61.4 (24.1)           |
| 4. How often do you think: “I can’t take it anymore”?                                      | 4.8                                                               | 33.7                                                    | 33.7                                             | 19.3                                                 | 8.4                                                                         | 51.8 (25.8)           |
| 5. How often do you feel worn out?                                                         | 1.2                                                               | 27.7                                                    | 47                                               | 15.7                                                 | 8.4                                                                         | 49.3 (22.7)           |
| 6. How often do you feel weak and susceptible to illness?                                  | 6                                                                 | 28.9                                                    | 32.5                                             | 19.3                                                 | 13.3                                                                        | 48.7 (28.1)           |
| <b>Total average score</b>                                                                 |                                                                   |                                                         |                                                  |                                                      |                                                                             | <b>55.9 (19.2)</b>    |
| <b>WB.Work-related burnout (<math>\alpha= 0.82</math>, N=83)</b>                           |                                                                   |                                                         |                                                  |                                                      |                                                                             |                       |
| 1. Is your work emotionally exhausting?                                                    | 26.5                                                              | 42.2                                                    | 18.1                                             | 10.8                                                 | 2.4                                                                         | 69.8 (25.8)           |
| 2. Do you feel burnt out because of your work?                                             | 16.9                                                              | 41                                                      | 25.3                                             | 12                                                   | 4.8                                                                         | 63.2 (26.5)           |
| 3. Does your work frustrate you?                                                           | 7.2                                                               | 12                                                      | 36.1                                             | 21.7                                                 | 22.9                                                                        | 39.7 (29.4)           |
| 4. Do you feel worn out at the end of the working day?                                     | 12                                                                | 32.5                                                    | 28.9                                             | 19.3                                                 | 7.2                                                                         | 55.7 (27.9)           |
| 5. Are you exhausted in the morning at the thought of another day at work?                 | 7.2                                                               | 19.3                                                    | 37.3                                             | 13.3                                                 | 22.9                                                                        | 43.6 (30.4)           |
| 6. Do you have enough energy for family and friends during leisure time? (inverse scoring) | 7.2                                                               | 15.7                                                    | 36.1                                             | 24.1                                                 | 16.9                                                                        | 43.0 (28.0)           |
| 7.Do you feel that every working hour is tiring for you?                                   | 9.6                                                               | 30.1                                                    | 30.1                                             | 20.5                                                 | 9.6                                                                         | 52.4 (25.2)           |
| <b>Total average score</b>                                                                 |                                                                   |                                                         |                                                  |                                                      |                                                                             | <b>52.5 (20.6)</b>    |
| <b>CB. Client-related burnout(<math>\alpha=0.88</math>, N=83)</b>                          |                                                                   |                                                         |                                                  |                                                      |                                                                             |                       |
| 1. Do you find it hard to                                                                  | 4.8                                                               | 21.7                                                    | 32.5                                             | 22.9                                                 | 18.1                                                                        | 43.07 (28.5)          |

|                                                                                        |      |      |      |      |      |                    |
|----------------------------------------------------------------------------------------|------|------|------|------|------|--------------------|
| work with clients?                                                                     |      |      |      |      |      |                    |
| 2. Do you find it frustrating to work with clients?                                    | 2.4  | 8.4  | 30.1 | 30.1 | 28.9 | 31.3 (26.1)        |
| 3. Does it drain your energy to work with clients?                                     | 3.6  | 14.5 | 32.5 | 27.7 | 21.7 | 37.6 (27.4)        |
| 4. Do you feel that you give more than you get back when you work with clients?        | 15.7 | 19.3 | 28.9 | 21.7 | 14.5 | 50 (31.9)          |
| 5. Are you tired of working with clients?                                              | 3.7  | 15.9 | 19.5 | 28   | 32.9 | 32.3 (29.7)        |
| 6. Do you sometimes wonder how long you will be able to continue working with clients? | 7.3  | 19.5 | 14.6 | 28   | 30.5 | 36.2 (32.6)        |
| <b>Total average score</b>                                                             |      |      |      |      |      | <b>38.4 (23.1)</b> |

**Table S2.** T-test results: Perceived job stress level and system type.

| t-test for Equality of Means |    |      |       |      |    |       |                 |                       |       |       |  |
|------------------------------|----|------|-------|------|----|-------|-----------------|-----------------------|-------|-------|--|
| Group                        | N  | Mean | S. D. | t    | df | p     | Mean Difference | Std. Error Difference | CI4   |       |  |
|                              |    |      |       |      |    |       |                 |                       | Lower | Upper |  |
| Public system                | 59 | 8.97 | 1.48  | 3.36 | 80 | 0.001 | 1.27            | 0.378                 | 0.519 | 2.022 |  |
| Private system               | 23 | 7.70 | 1.66  |      |    |       |                 |                       |       |       |  |

**Table S3.** T-test results: Burnout scales –Paired Differences.

| t-test for Equality of Means |       |       |    |      |                    |                          |       |       |
|------------------------------|-------|-------|----|------|--------------------|--------------------------|-------|-------|
|                              | S. D. | t     | df | p    | Mean<br>Difference | Std. Error<br>Difference | CI4   |       |
|                              |       |       |    |      |                    |                          | Low   | Uper  |
| Work-Personal                | 17.49 | -1.77 | 82 | 0.07 | -3.41              | 1.92                     | -7.23 | 0.40  |
| Work-Client                  | 19.2  | 6.69  | 82 | 0.00 | 14.15              | 2.11                     | 9.94  | 18.36 |
| Personal- Client             | 25.4  | 6.28  | 82 | 0.00 | 17.57              | 2.79                     | 12.01 | 23.12 |

**Table S4.** Chi-Square Tests - Level of work-related burnout.

|                                                   | Pearson Chi-Square Value | df | Asymp. Sig. (2-sided) | Phi Value | Approx. Sig. |
|---------------------------------------------------|--------------------------|----|-----------------------|-----------|--------------|
| Intention to resign from work                     | 17.36                    | 3  | 0.001                 | 0.45      | 0.000        |
| Intention to change profession                    | 14.94                    | 3  | 0.002                 | 0.41      | 0.003        |
| Intention to change the category of beneficiaries | 6.38                     | 3  | 0.094                 | 0.28      | 0.074        |

**Table S5.** The high perceived workload, organisational support and level of work-related burnout.

|                         |                             | t-test for Equality of Means |       |       |      |    |       |                 |                       |       |       |
|-------------------------|-----------------------------|------------------------------|-------|-------|------|----|-------|-----------------|-----------------------|-------|-------|
| Group                   |                             | N                            | Mean  | S. D. | t    | df | p     | Mean Difference | Std. Error Difference | CI4   |       |
|                         |                             |                              |       |       |      |    |       |                 |                       | Lower | Upper |
| High perceived workload | Organizational suport (no)  | 16                           | 67.18 | 18.18 | 2.58 | 40 | 0.014 | 17.66           | 6.83                  | 3.85  | 31.83 |
|                         | Organizational suport (yes) | 26                           | 49.51 | 23.28 |      |    |       |                 |                       |       |       |
